# Supplementary material for: Synthesis of linear and star poly(ε-caprolactone) with controlled and high molecular weightsviacyclic trimeric phosphazene base catalyzed ring-opening polymerization
Source: Royal Society of Chemistry journal article supplement (doi:10.1039/c7py01673e), 2017-01-01
Supplement: c7py01673e1.pdf [file c7py01673e1.pdf]

# **Synthesis of Linear and Star Poly( $\epsilon$ -caprolactone) with Controlled and High Molecular Weights via Cyclic Trimeric Phosphazene Base Catalyzed Ring-Opening Polymerization**

Huaike Li,<sup>†</sup> Na Zhao,<sup>†</sup> Chuanli Ren, Shaofeng Liu,<sup>\*</sup> and Zhibo Li<sup>\*</sup>

*Key Laboratory of Biobased Polymer Materials, Shandong Provincial Education Department; School of Polymer Science and Engineering, Qingdao University of Science and Technology, Qingdao 266042, China.*

*E-mail: [shaofengliu@qust.edu.cn](mailto:shaofengliu@qust.edu.cn) and [zbli@qust.edu.cn](mailto:zbli@qust.edu.cn)*

<sup>†</sup>These authors contributed equally.

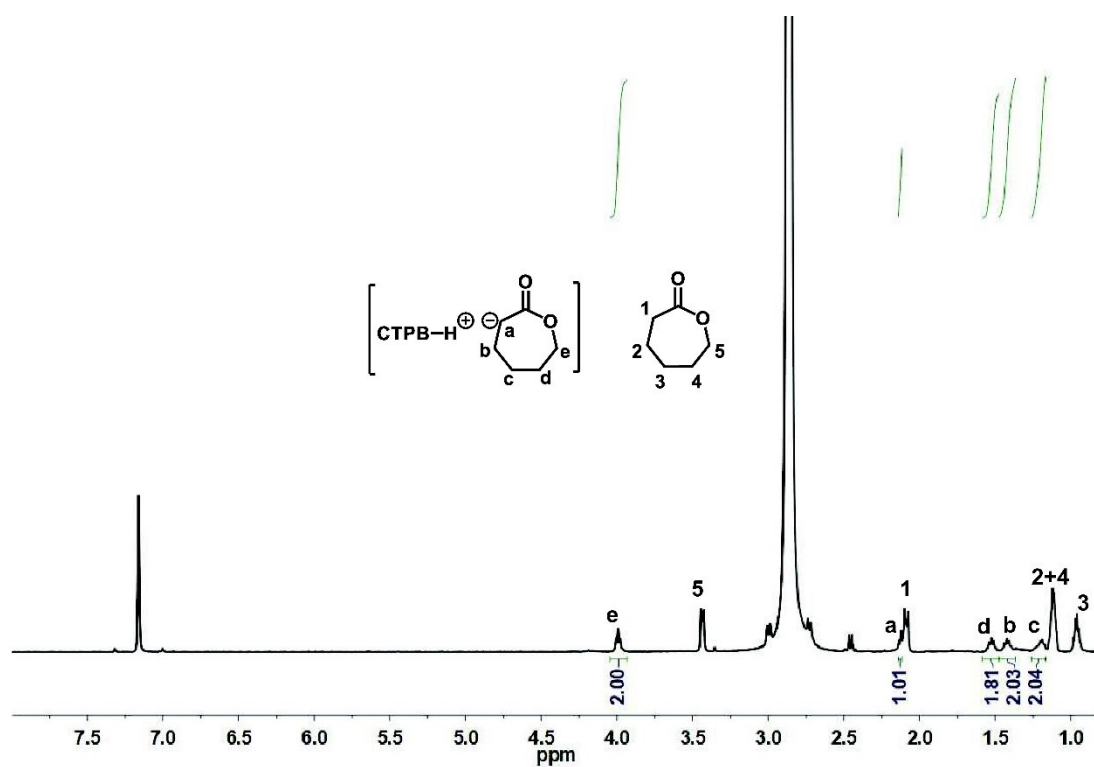

**Figure S1.** <sup>1</sup>H NMR spectrum of CTPB + 1 equiv. ε-CL for 2 hours at room temperature in C<sub>6</sub>D<sub>6</sub>.

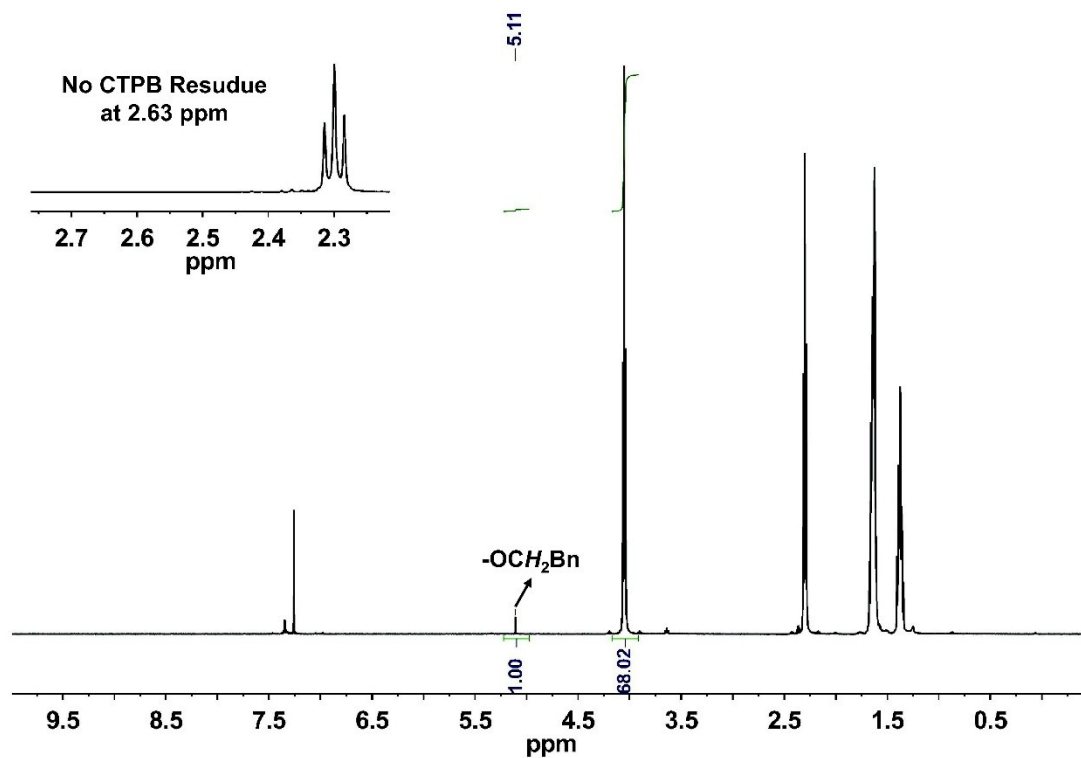

**Figure S2.** <sup>1</sup>H NMR spectrum of PCL obtained in Table 1 entry 11 (ε-CL/CTPB/BnOH = 5000/1/50;  $M_{n,NMR}$  = 7.8 kDa).



◆ TMP-PCL<sub>3</sub>-Na<sup>+</sup>,  $\Delta m/z = 114.14$

▼ TMP-PCL<sub>3</sub>-K<sup>+</sup>,  $\Delta m/z = 114.14$

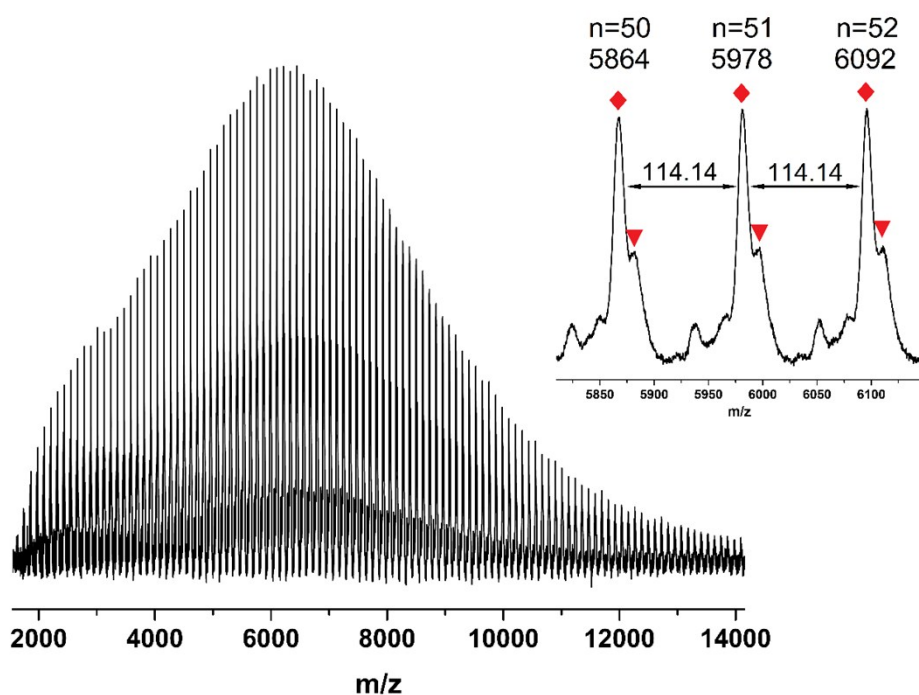

**Figure S5.** MALDI-TOF mass spectrum of PCL produced by  $\epsilon$ -CL /CTPB/TMP = 300/1/3 for 2 min (Table 1 run 14,  $M_{n,theor} = 11.6$  kDa,  $M_{n,GPC} = 12.0$  kDa,  $M_{n,MALDI} = 6.4$  kDa).

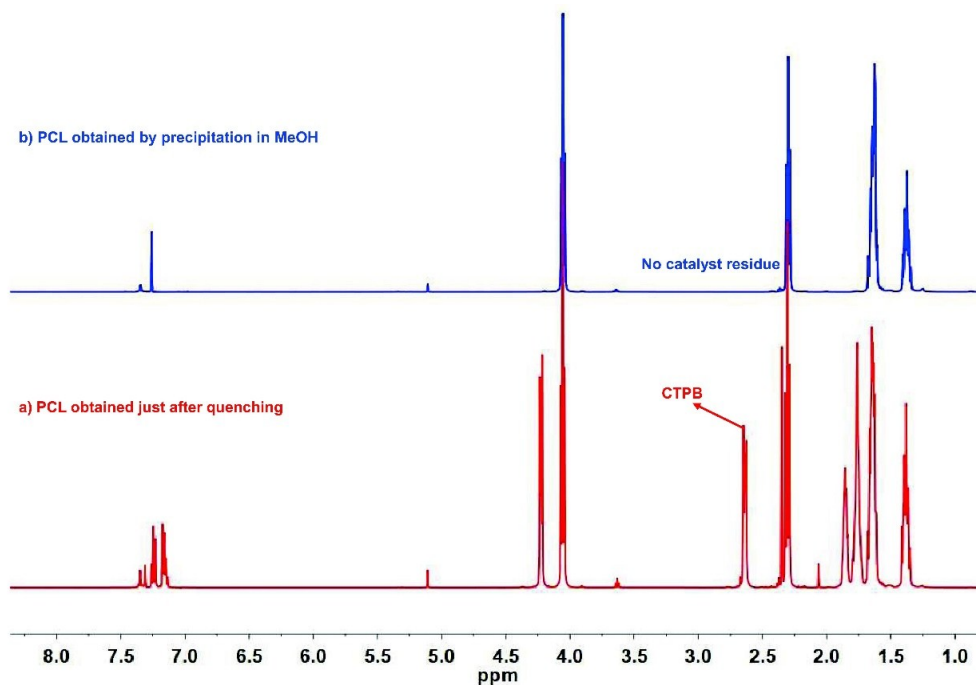

**Figure S6.** <sup>1</sup>H NMR spectra of PCL obtained in Table 1 entry 11 ( $\epsilon$ -CL/CTPB/BnOH = 5000/1/50); (a) PCL obtained just after quenching and (b) PCL obtained by precipitation in MeOH.

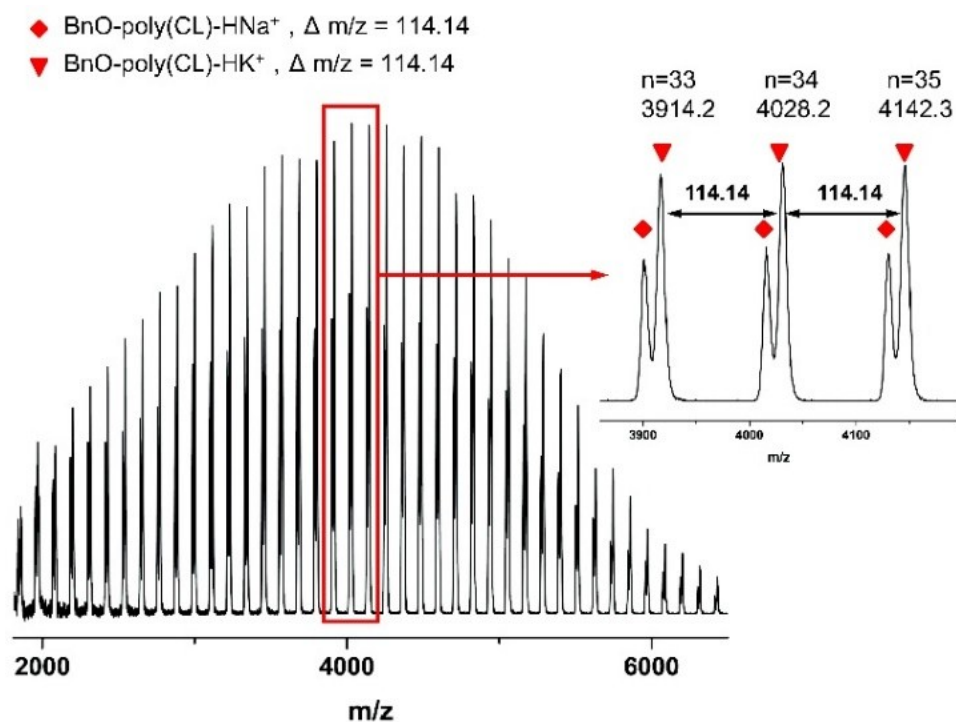

**Figure S7.** MALDI-TOF mass spectrum of PCL produced by  $\epsilon$ -CL /CTPB/BnOH = 5000/1/50 (Table 1 run 11,  $M_{n,theor} = 7.0$  kDa,  $M_{n,GPC} = 7.5$  kDa,  $M_{n,MALDI} = 3.8$  kDa).

**Table S1.** ROP of  $\epsilon$ -CL initiated by CTPB/alcohol system.<sup>a</sup>

| Entry | [M] <sub>0</sub> /[C] <sub>0</sub> /[I] <sub>0</sub> | Initiator | Time [min] | <i>T</i> [°C] | Conv. <sup>b</sup> [%] | $M_{n,theor}$ [kDa] | $M_{n,GPC}^c$ [kDa] | $\mathcal{D}^c$ |
|-------|------------------------------------------------------|-----------|------------|---------------|------------------------|---------------------|---------------------|-----------------|
| 1     | 100/1/3                                              | BnOH      | 2          | 20            | 67                     | 2.6                 | 2.9                 | 1.31            |
| 2     | 2000/1/1                                             | BnOH      | 60         | 20            | 50                     | 114.1               | 119.9               | 2.05            |
| 3     | 5000/1/50                                            | BnOH      | 30         | 60            | 72                     | 8.3                 | 9.1                 | 1.66            |
| 4     | 5000/1/50                                            | BnOH      | 30         | 90            | 88                     | 10.1                | 11.0                | 1.65            |

<sup>a</sup>Conditions: CTPB 0.05 mmol; [CTPB] was from 0.001 to 0.003 mol/L; base and initiator were mixed firstly in toluene, followed by  $\epsilon$ -CL. <sup>b</sup>Determined by <sup>1</sup>H NMR. <sup>c</sup>Determined by GPC at 40 °C in THF relative to PS standards.
